# Supplementary material
Source: PubMed Central journal article supplement (PMC6397508)
Supplement: pnas.1816197116.sapp.pdf [file pnas.1816197116.sapp.pdf]

## Supplementary Information

# Additive Manufacturing of Patterned 2D Semiconductor through Recyclable Masked Growth

Yunfan Guo<sup>1</sup>, Pin-Chun Shen<sup>1</sup>, Cong Su<sup>2</sup>, Ang-Yu Lu<sup>1</sup>, Marek Hempel<sup>1</sup>, Yimo Han<sup>3</sup>, Qingqing Ji<sup>1</sup>, Yuxuan Lin<sup>1</sup>, Enzheng Shi<sup>4</sup>, Elaine McVay<sup>1</sup>, Letian Dou<sup>4</sup>, David A. Muller<sup>3</sup>, Tomás Palacios<sup>1</sup>, Ju Li<sup>2</sup>, Xi Ling<sup>5\*</sup>, Jing Kong<sup>1\*</sup>

<sup>1</sup>Department of Electrical Engineering and Computer Science, Massachusetts Institute of Technology, Cambridge MA 02139, USA

<sup>2</sup>Department of Nuclear and Materials Science and Engineering, Massachusetts Institute of Technology, Cambridge MA 02139, USA

<sup>3</sup>School of Applied & Engineering Physics, Cornell University, Ithaca, New York 14850, USA

<sup>4</sup>Davidson School of Chemical Engineering, Purdue University, West Lafayette, IN 47907, USA

<sup>5</sup>Department of Chemistry, Division of Materials Science and Engineering, and The photonics Center, Boston University, Boston, MA 02215, USA

## Supplementary Text

**Characterization:** AFM characterization was conducted on a Dimension 3100 instrument, from VEECO Instruments Inc. Raman and PL spectra were carried out on a Horiba Jobin-Yvon HR800 system and a Witec Alpha300-confocal Raman Microscope. The laser excitation wavelength for Raman and PL measurements were 532.5 nm. Laser power was about 0.1 mW. A 50X objective was used to focus the laser beam. For PL and Raman mapping, the scanning step sizes are 0.8  $\mu\text{m}$  on a Horiba HR800 system, and 0.3  $\mu\text{m}$  on a Witec Alpha 300-confocal Raman Microscope. The atomic structure of the sample was acquired by imaging using an aberration corrected Nion UltraSTEM100. The sample was baked in vacuum under 160°C for 8 hours before insertion into the microscope chamber. The electron acceleration voltage was kept at 60 kV during the operation to avoid the knock-on damage during imaging. The vacuum level during the experiments was kept under  $3 \times 10^{-9}$  mbar. The convergence angle of electron probe is 60 mrad and the collection angle of the high angle annular dark field (HAADF) is 70-200 mrad.

**Device Fabrication and Measurement:** Patterned monolayer MoS<sub>2</sub> nanostructures were first transferred onto 300 nm SiO<sub>2</sub>/p+-Si substrates by the PMMA transfer method. E-beam lithography (EBL), e-beam evaporation followed by a lift-off process were used to deposit Ni/Au (30/20 nm) as electrodes. Since all devices are based on patterned monolayer MoS<sub>2</sub> nanostructures, there is no need to use oxygen plasma to isolate the channel area. The transport measurements were carried out under ambient environment at room temperature using a semiconductor parameter analyzer (Agilent 4155C) and a cryogenic probe station (Lakeshore).

**FET Device based on patterned monolayer MoS<sub>2</sub>.** The linear output characteristics demonstrate that Ohmic-like contact is achieved at the interface. We extract the mobility of the MoS<sub>2</sub> FET using Equation (1).

$$\mu_{FE} = \frac{L_{ch}}{W_{ch} C_{ox} V_{ds}} \frac{dI_{ds}}{dV_{bg}} \quad (1)$$

where  $C_{ox}$  is the gate capacitance,  $L_{ch}$  ( $= 2 \mu\text{m}$ ) and  $W_{ch}$  ( $= 10 \mu\text{m}$ ) are channel length and width, respectively. The contact resistance ( $R_c$ ) of our MoS<sub>2</sub> FETs was further extracted based on the transfer length method. Fig. 1J shows a linear fit to the total resistance normalized by channel width ( $R_{TOT}$ ) versus  $L_{ch}$ , of which the vertical intercept yields the total contact resistance ( $2R_c$ ). The carrier density  $n$  is estimated by a linear charge dependence on the gate voltage overdrive

$$n = \frac{C_{ox}}{q} (V_{bg} - V_T) \quad (2)$$

where  $V_T$  is the threshold voltage obtained by linear extrapolation at maximum trans-conductance for each channel (*SI Appendix*, Fig. S7b). We extract  $R_c \approx 6.7 \text{ k}\Omega \cdot \mu\text{m}$  at room temperature for a carrier density  $n$  of about  $1.8 \times 10^{12} \text{ cm}^{-2}$ .

**First-principles calculation:** First-principles calculation was performed using density functional theory (DFT) within the general gradient approximation (GGA), in the form of Perdew-Burke-Ernzerhof's exchange-correlation functional. The term for van der Waals correction is included in the Kohn-Sham energy as in the form of Grimme's DFT-D2 method. The energy cutoff for the plane wave basis set was chosen to be 350 eV for all the calculations. The code is implemented by the Vienna Ab-initio Simulation Package (VASP).

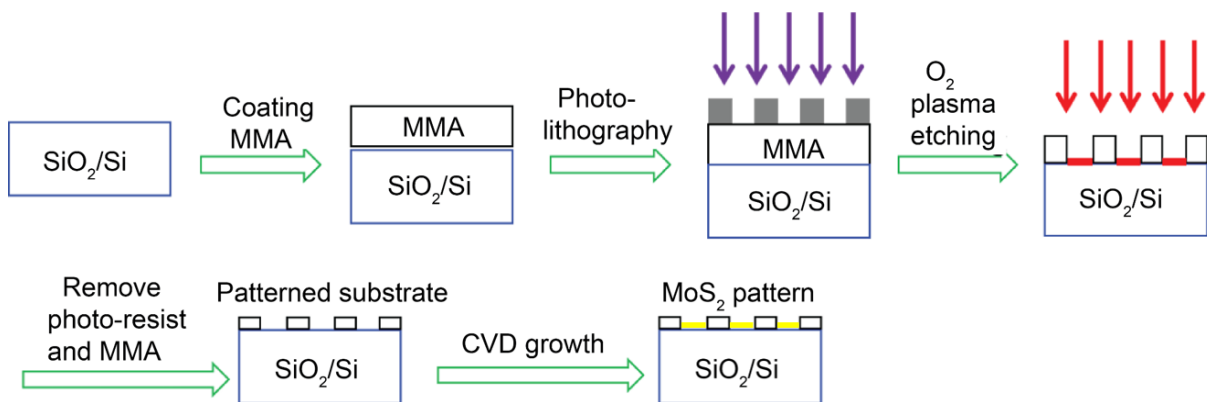

**Figure S1.** Schematic representation of procedure to directly grow MoS<sub>2</sub> patterns by modifying the growth substrate.

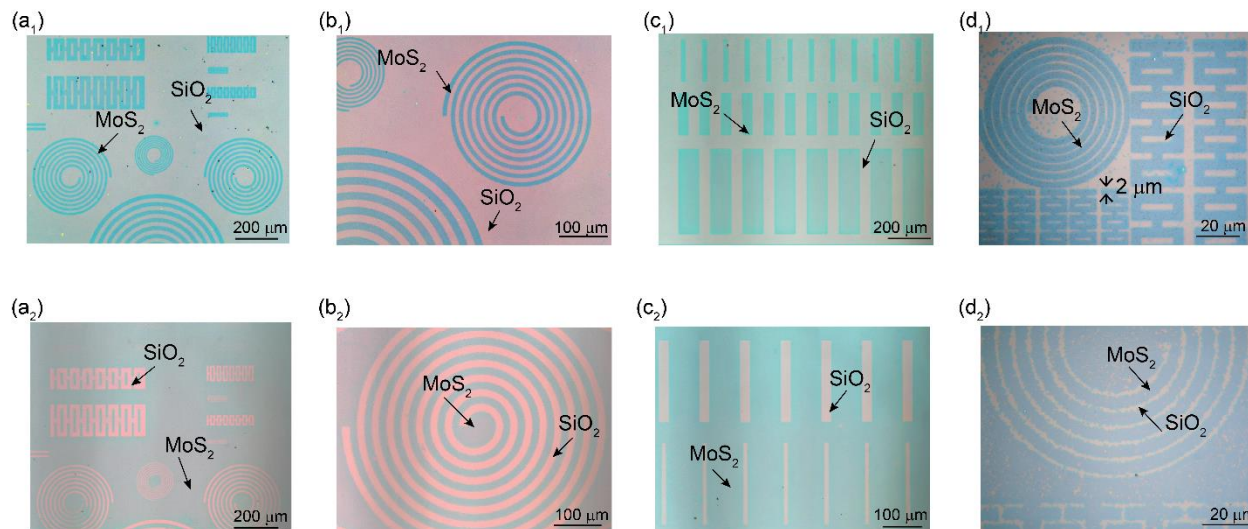

**Figure S2.** Optical microscope (OM) images of monolayer MoS<sub>2</sub> kirigami nanostructures and films. (a<sub>1</sub>) Typical OM image of monolayer MoS<sub>2</sub> kirigami patterns on SiO<sub>2</sub>/Si substrate. (a<sub>2</sub>) Typical OM image of patterned monolayer MoS<sub>2</sub> film grows at the opposite locations when a negative photoresist was used for pattern in (a<sub>1</sub>). (b<sub>1</sub>-b<sub>2</sub>) OM images of monolayer MoS<sub>2</sub> spiral patterns (b<sub>1</sub>), and inverse MoS<sub>2</sub> spiral (b<sub>2</sub>) on SiO<sub>2</sub>/Si substrate. (c<sub>1</sub>-c<sub>2</sub>) OM images of monolayer

MoS<sub>2</sub> stripes in an 8×3 array (c<sub>1</sub>), and inverse MoS<sub>2</sub> stripes (c<sub>2</sub>) on SiO<sub>2</sub>/Si. (d<sub>1</sub>-d<sub>2</sub>) OM images of monolayer MoS<sub>2</sub> spiral patterns (d<sub>1</sub>), and inverse MoS<sub>2</sub> spiral pattern (d<sub>2</sub>) on SiO<sub>2</sub>/Si.

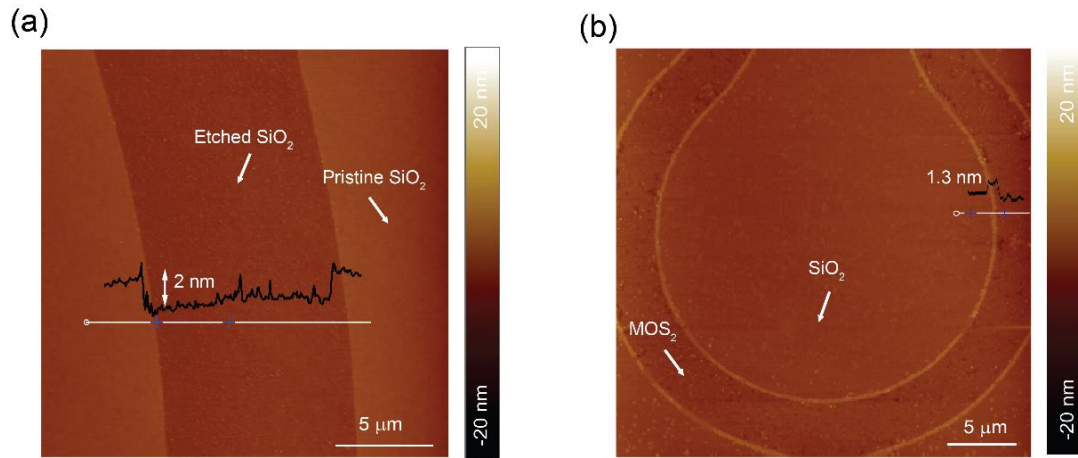

**Figure S3.** (a) AFM image and the corresponding height profile of the patterned SiO<sub>2</sub>/Si substrate before MoS<sub>2</sub> growth. (b) AFM image and the corresponding height profile of a monolayer MoS<sub>2</sub> circular pattern grown on modified SiO<sub>2</sub>/Si substrate.

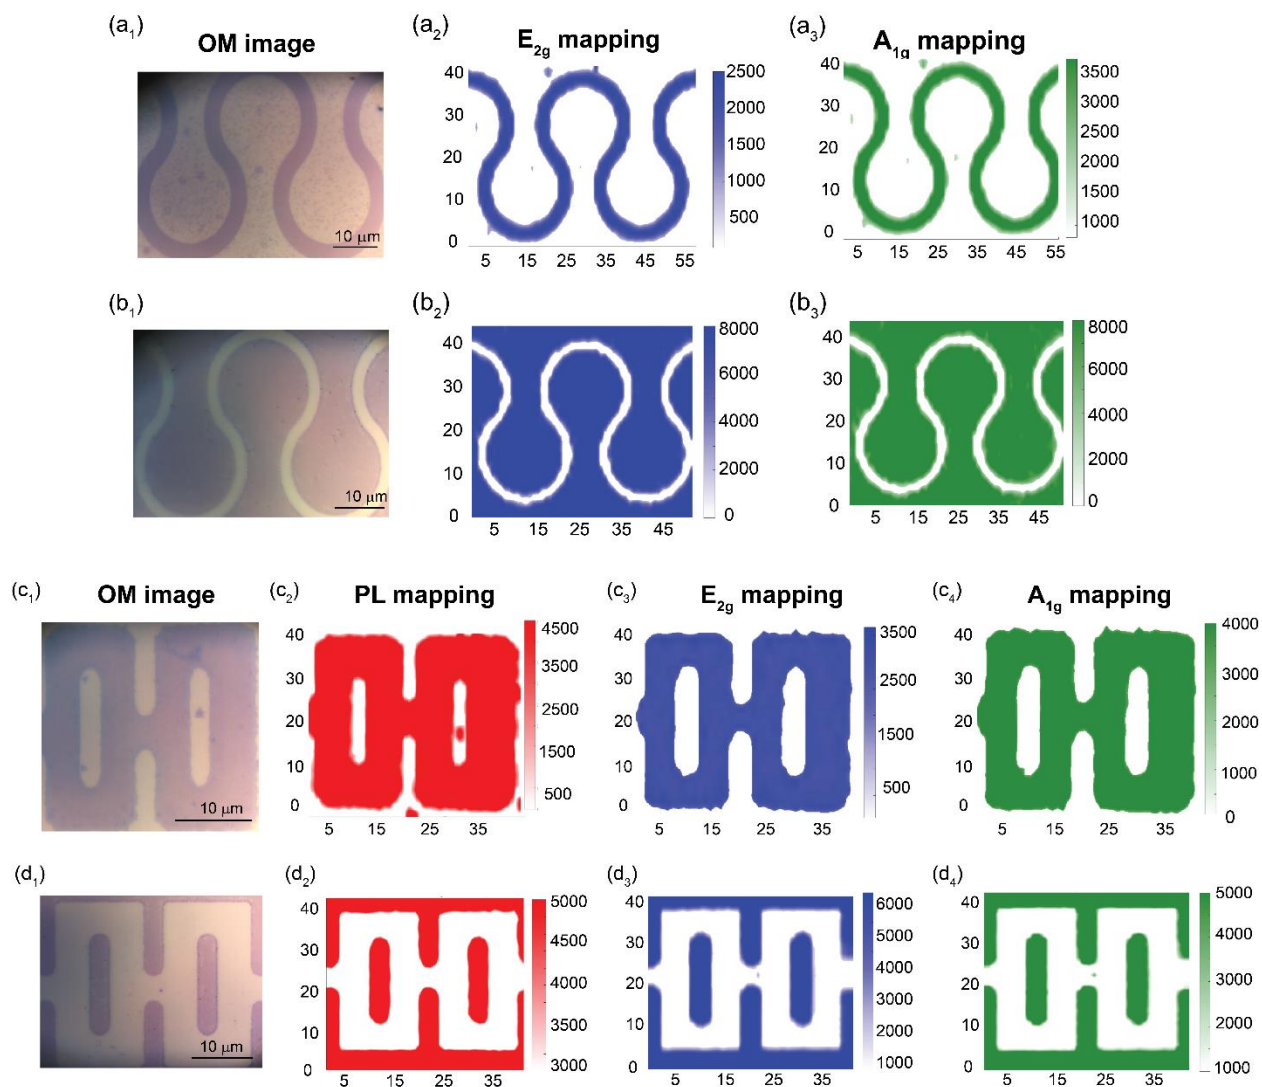

**Figure S4. Optical microscope, Raman and PL spectra characterizations of the monolayer MoS<sub>2</sub> patterns.** (a<sub>1</sub>) OM image of a monolayer MoS<sub>2</sub> wave kirigami pattern. (a<sub>2</sub>) The corresponding E<sub>2g</sub> Raman mapping image of MoS<sub>2</sub> pattern in (a<sub>1</sub>). (a<sub>3</sub>) The corresponding A<sub>1g</sub> Raman mapping image of MoS<sub>2</sub> pattern in (a<sub>1</sub>). (b<sub>1</sub>-b<sub>3</sub>) OM image, E<sub>2g</sub> Raman mapping and A<sub>1g</sub> Raman mapping of a monolayer MoS<sub>2</sub> wave pattern. (c<sub>1</sub>) OM image of a monolayer MoS<sub>2</sub> rectangle pattern. (c<sub>2</sub>) The corresponding PL mapping of MoS<sub>2</sub> pattern in (c<sub>1</sub>). (c<sub>3</sub>, c<sub>4</sub>) The corresponding Raman mappings (c<sub>3</sub> for E<sub>2g</sub> peak and c<sub>4</sub> for A<sub>1g</sub> peak) of MoS<sub>2</sub> pattern in (c<sub>1</sub>). (d<sub>1</sub>-d<sub>4</sub>) OM image, PL mapping and Raman mappings of another monolayer MoS<sub>2</sub> pattern.

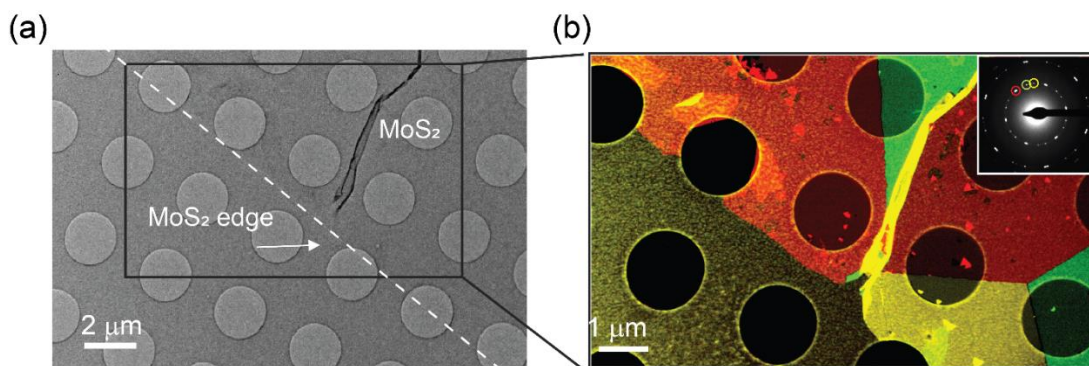

**Figure S5.** (a) Bright field TEM image of the edge of a monolayer MoS<sub>2</sub> pattern. (b) The corresponding dark field TEM image of the monolayer MoS<sub>2</sub> edge in (a), showing the grain size of the patterned region is greater than 5 μm. Inset: the diffraction image suggest this region is polycrystalline.

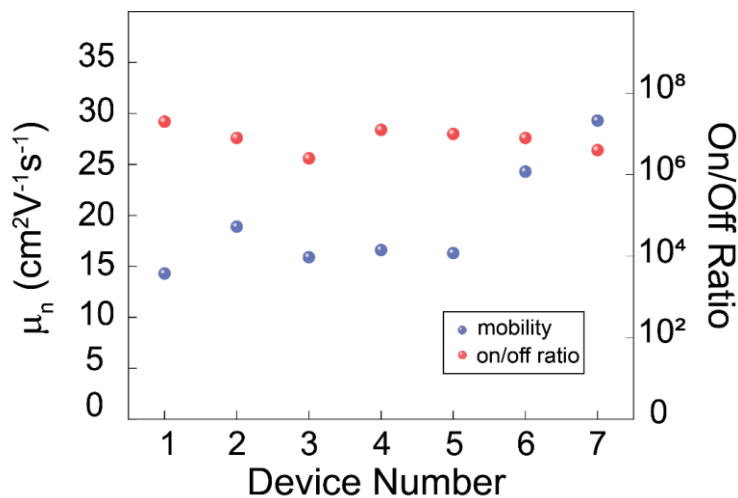

**Figure S6.** Electron mobility and on/off current ratio for 7 monolayer MoS<sub>2</sub> FETs measured in this work. All electrical measurements were carried out under ambient environment at room temperature.

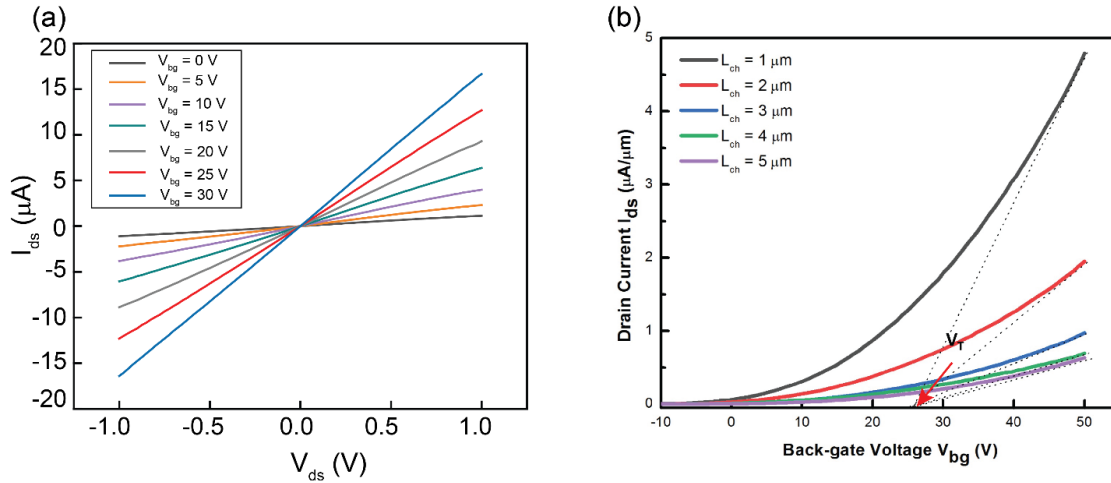

**Figure S7.** (a) Output ( $I_{ds}$ – $V_{ds}$ ) characteristics of the same MoS<sub>2</sub> transistor with gate voltages from 0 to 30 V, the linear behavior suggesting Ohmic contacts between MoS<sub>2</sub> and Au electrodes. (b)  $I_{ds}$ – $V_{bg}$  characteristics of five typical transistors fabricated on the directly grown MoS<sub>2</sub> patterns with different channel lengths, L (1, 2, 3, 4, and 5 μm).

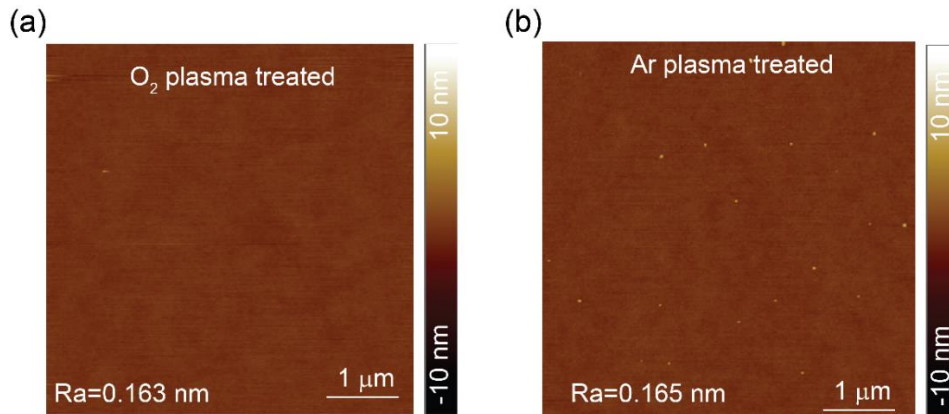

**Figure S8.** The comparison of surface roughness for O<sub>2</sub> plasma and Ar plasma treated SiO<sub>2</sub>/Si substrates. (a) AFM height of O<sub>2</sub> plasma treated SiO<sub>2</sub>/Si substrate. (b) AFM height of Ar plasma treated SiO<sub>2</sub>/Si substrate.



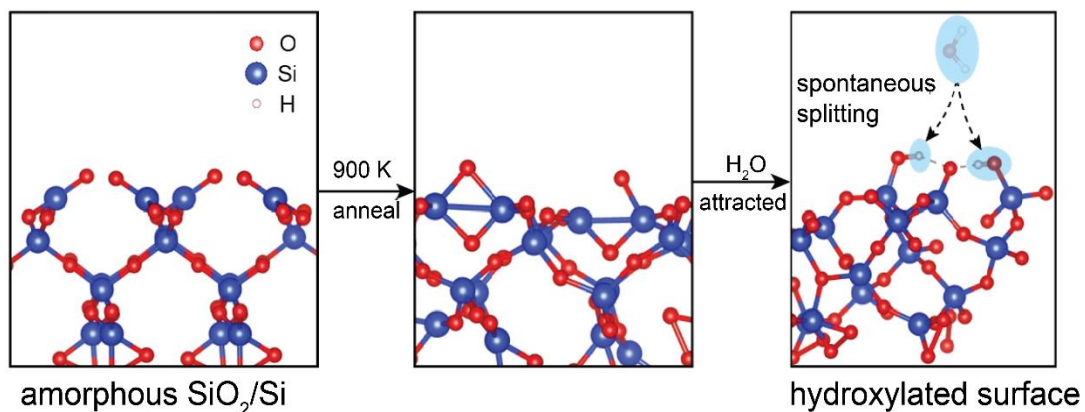

**Figure S9.** The hydroxylation process for amorphous SiO<sub>2</sub>/Si substrates.

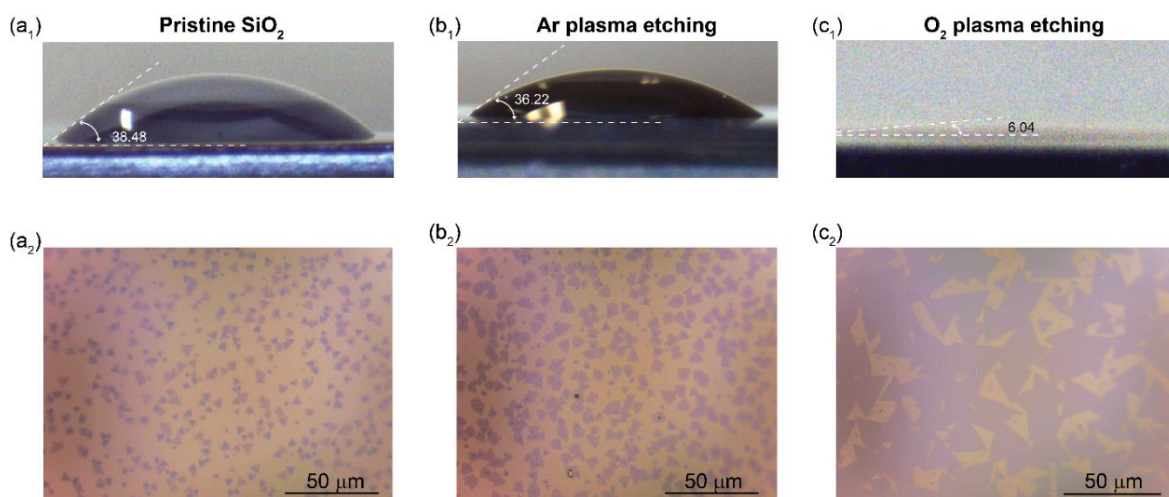

**Figure S10.** The contact angles of SiO<sub>2</sub>/Si treated by different methods, and CVD growth results of MoS<sub>2</sub> flakes grown on corresponding treated surfaces. (a<sub>1</sub>, a<sub>2</sub>) contact angle for pristine SiO<sub>2</sub>/Si substrate (a<sub>1</sub>), and the OM image of MoS<sub>2</sub> grown on pristine SiO<sub>2</sub>/Si (a<sub>2</sub>). (b<sub>1</sub>, b<sub>2</sub>) contact angle for Ar plasma treated SiO<sub>2</sub>/Si substrate (b<sub>1</sub>), and the OM image of MoS<sub>2</sub> grown on Ar plasma treated SiO<sub>2</sub>/Si (b<sub>2</sub>). (c<sub>1</sub>, c<sub>2</sub>) contact angle for O<sub>2</sub> plasma treated SiO<sub>2</sub>/Si substrate (c<sub>1</sub>), and the OM image of MoS<sub>2</sub> grown on O<sub>2</sub> plasma treated SiO<sub>2</sub>/Si (c<sub>2</sub>). The results here indicate that

substrates with better wettability (thus higher surface energies) are more beneficial for the growth of monolayer MoS<sub>2</sub>.

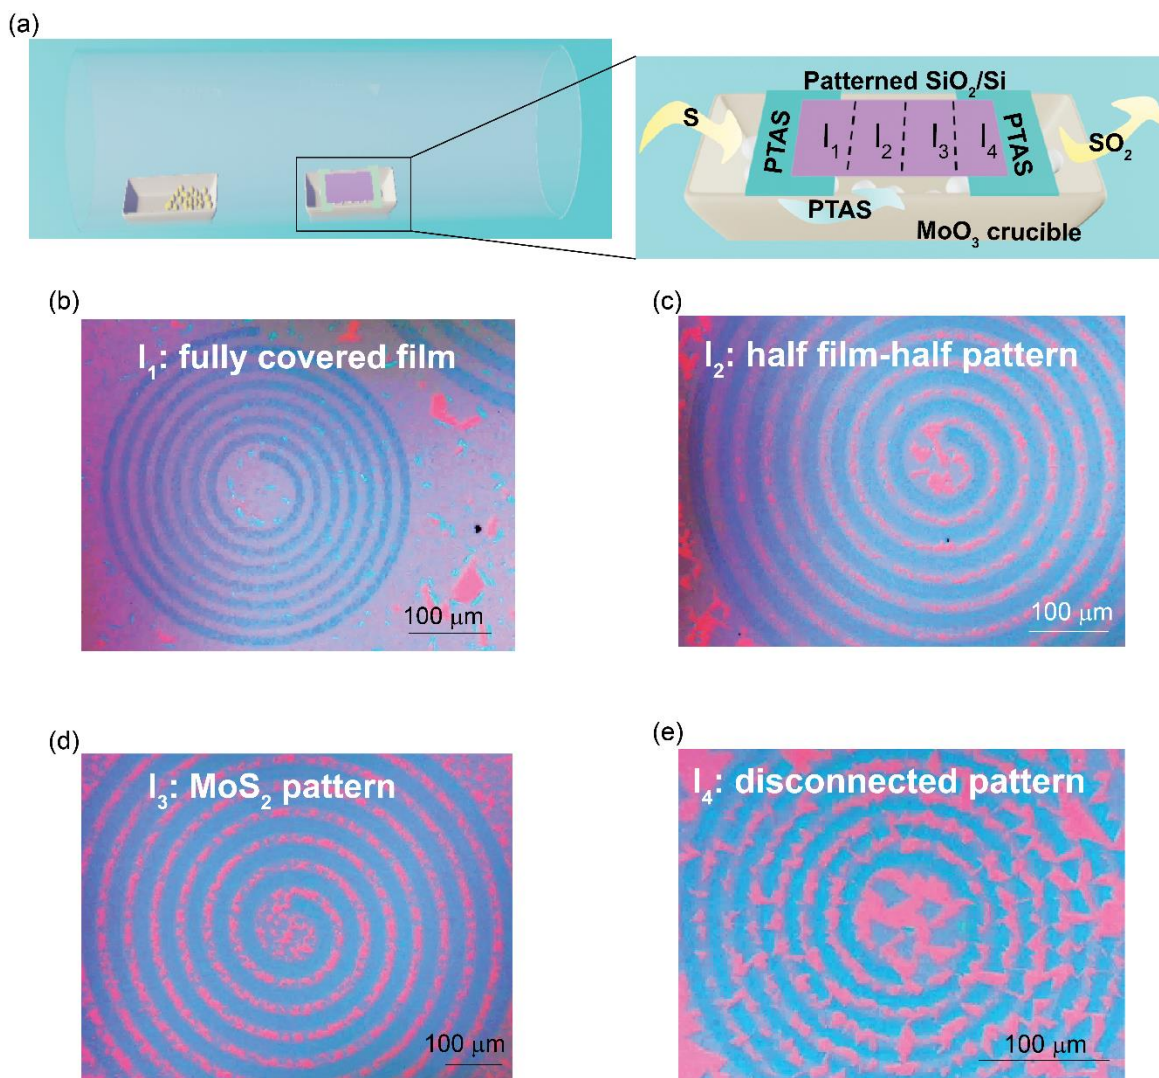

**Figure S11.** (a) Schematic illustration and the enlarged feature of the MoO<sub>3</sub> crucible covered by patterned SiO<sub>2</sub>/Si substrate in a typical CVD growth system. (b-e) OM images of MoS<sub>2</sub> patterns grown on different regions (I<sub>1</sub>-I<sub>4</sub>) with different sulfur concentration. The sulfur concentration decreases from region I<sub>1</sub> in (b) to region I<sub>4</sub> in (e).

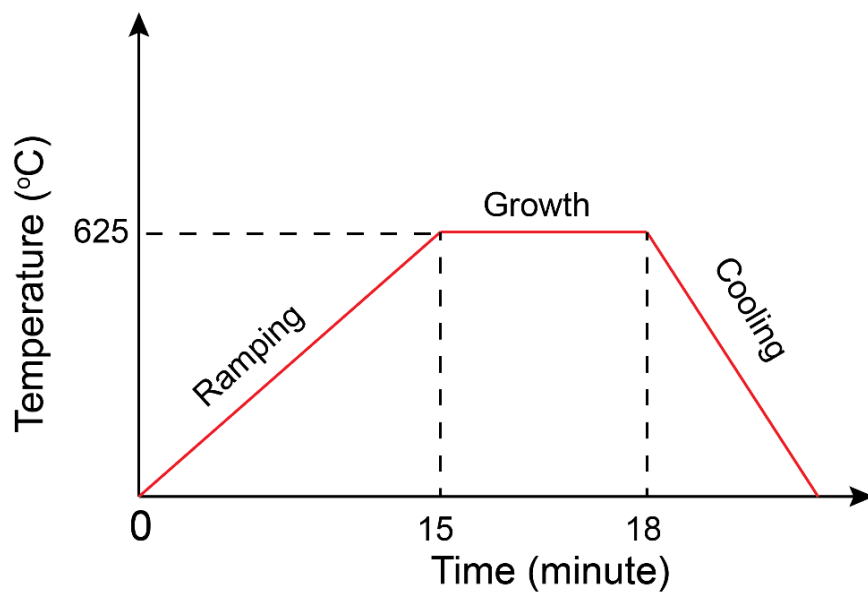

**Figure S12.** The temperature profile of the MoS<sub>2</sub> growth process used for this work.

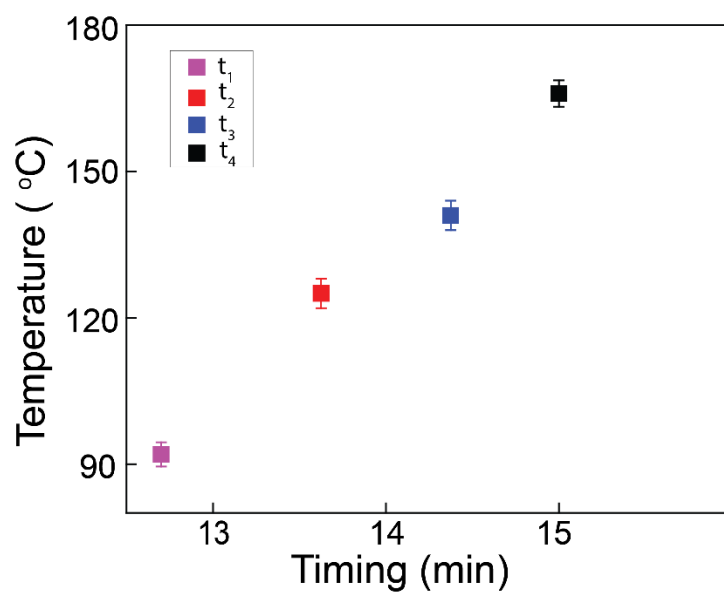

**Figure S13.** The relationship between the entrance timing of the sulfur precursor and the heating temperature at the corresponding location.

**Table S1.** Chart of the temperatures and partial pressures of sulfur and MoO<sub>3</sub>, respectively, at different entrance timing of sulfur precursor, (formulas see in ref. 1 and 2). The distance between the left edge of furnace and the front of sulfur boat is around 1.5 cm, corresponding to “d<sub>2</sub>” in Figure. 3C and Figure S14.

|                              | <b>t<sub>1</sub></b>        | <b>t<sub>2</sub></b>         | <b>t<sub>3</sub></b>       | <b>t<sub>4</sub></b>         |
|------------------------------|-----------------------------|------------------------------|----------------------------|------------------------------|
| <b>T<sub>MoO3</sub></b>      | 520 °C                      | 570 °C                       | 600 °C                     | 625 °C                       |
| <b>P<sub>MoO3</sub></b>      | 0.135×10 <sup>-7</sup> atm. | 4.8295×10 <sup>-7</sup> atm. | 33.8×10 <sup>-7</sup> atm. | 154.94×10 <sup>-7</sup> atm. |
| <b>T<sub>Sulfur</sub></b>    | 92 °C                       | 125 °C                       | 141 °C                     | 166 °C                       |
| <b>P<sub>Sulfur</sub></b>    | 2.3×10 <sup>-6</sup> atm.   | 6.8×10 <sup>-5</sup> atm.    | 1.4×10 <sup>-4</sup> atm.  | 4.28×10 <sup>-4</sup> atm.   |
| <b>[S]/[MoO<sub>3</sub>]</b> | 175.37                      | 137.79                       | 53                         | 27                           |

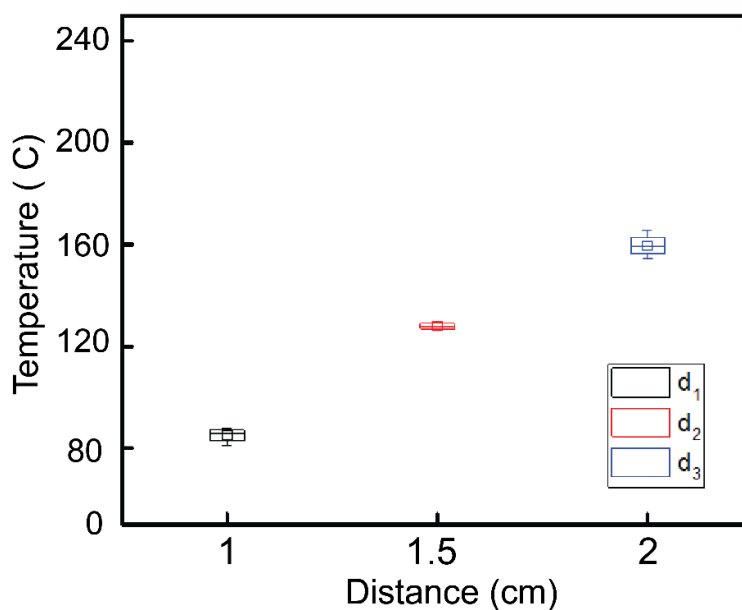

**Figure S14.** The relationship between the locations of the sulfur boat and the corresponding temperatures.

**Table S2.** The temperature, partial pressure of sulfur precursor, nucleation rate ( $\dot{N}$ ) and growth rate ( $\dot{G}$ ) in three dimensional (3D) and 2D of MoS<sub>2</sub> patterns at different offset locations of the sulfur boat. The nucleation rate and growth rate were semi-quantitatively calculated based on the following formulas<sup>3</sup>, respectively:  $\dot{N} = 2\pi r \cdot a_0 \sin\theta \frac{PN_A}{(2\pi MRT)^{1/2}} n_s \exp\left(\frac{E_{des}-E_S-\Delta G^*}{k_B T}\right)$ ;  $\dot{G} = \frac{MPV}{k_B T \rho A}$  (in 3D);  $\dot{G} = \frac{AMoS_2/Atot}{t_{growth}} \cdot h_{MoS_2} \cdot A_{tot}$  (in 2D)

|                                  | <b>d<sub>1</sub> (1 cm)</b> | <b>d<sub>2</sub> (1.5 cm)</b> | <b>d<sub>3</sub> (2 cm)</b> |
|----------------------------------|-----------------------------|-------------------------------|-----------------------------|
| <b>T<sub>Sulfur</sub></b>        | 85                          | 125                           | 160                         |
| <b>(P<sub>Sulfur</sub>)</b>      | 8.968×10 <sup>-4</sup> tor  | 9.12×10 <sup>-2</sup> tor     | 0.332 tor                   |
| <b><math>\dot{N}</math></b>      | 0.05±0.02                   | 0.8125±0.08                   | 2.5±0.05                    |
| <b>(3D) <math>\dot{G}</math></b> | 4.75±0.9                    | 11.4±0.8                      | 34±0.8                      |
| <b>(2D) <math>\dot{G}</math></b> | 0.416±0.038                 | 0.96±0.045                    | 0.74±0.033                  |

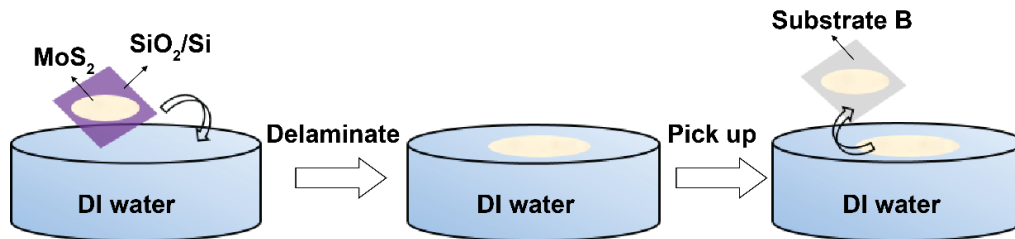

**Figure S15.** Schematic representation of water delamination procedures for the directly grown MoS<sub>2</sub> patterns.

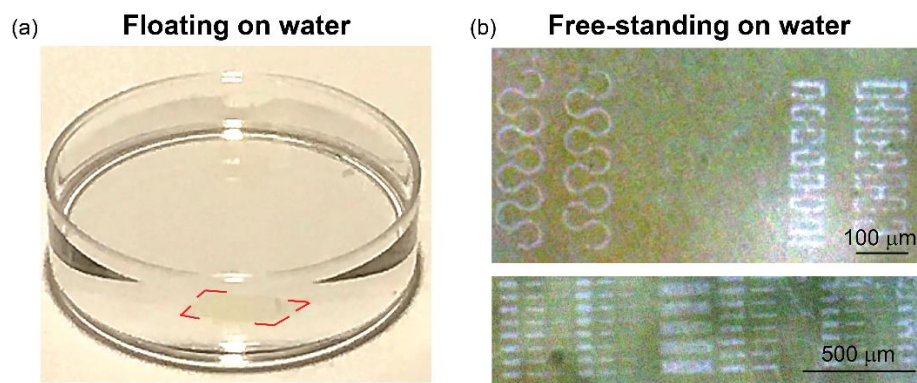

**Figure S16.** (a) Photograph for monolayer patterned MoS<sub>2</sub> film floating on the surface of water. (b) OM images of monolayer MoS<sub>2</sub> kirigami structures freestanding on a water surface without any additional support.

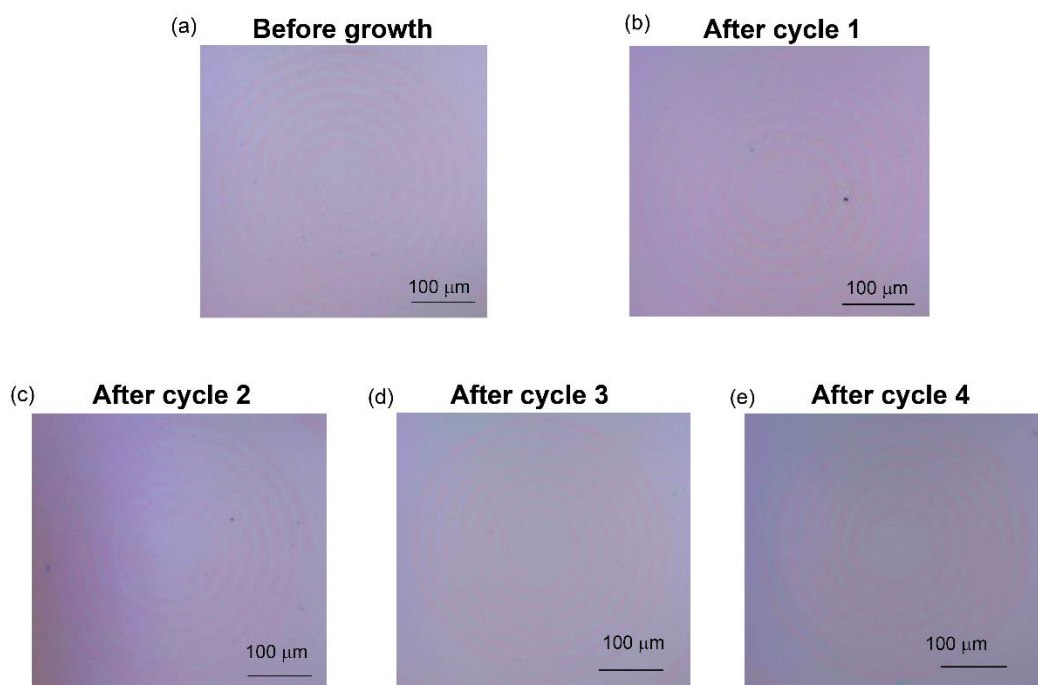

**Figure S17. Water delaminating transfer and recycled growth of patterned MoS<sub>2</sub> nanostructures.** (a) OM image of the patterned SiO<sub>2</sub>/Si substrate before growth. (b-e) OM images

of patterned SiO<sub>2</sub>/Si substrates after the first through fourth cycles of the water delaminating transfer.

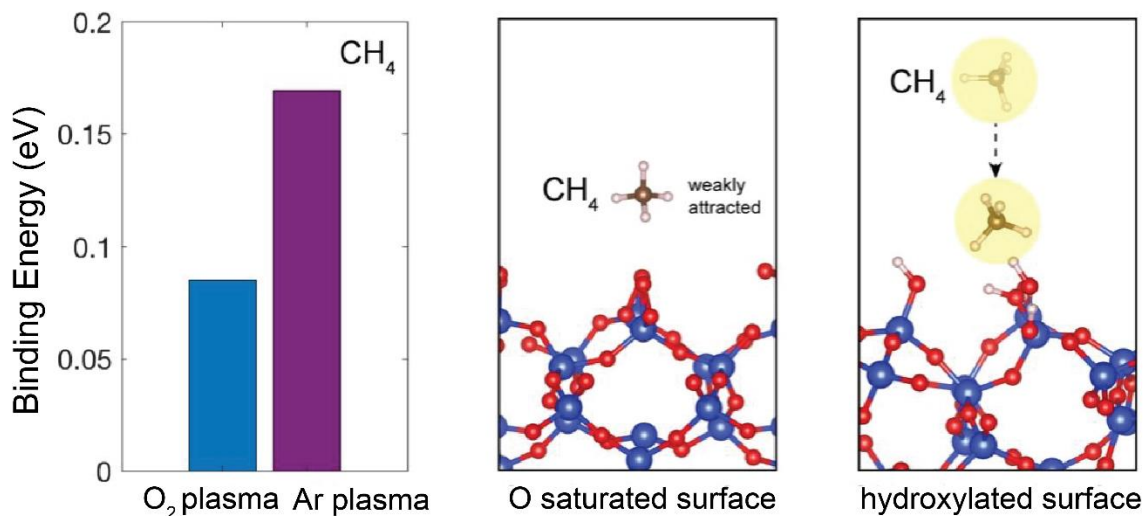

**Figure S18.** DFT calculation for the binding energy between amorphous carbon (to simplify the calculation, we use CH<sub>4</sub>, which contains only one carbon atom to stand for amorphous carbon) and the growth substrates treated by O<sub>2</sub> plasma and Ar plasma. The O saturated surface is only weakly attractive to CH<sub>4</sub> molecule, while the hydroxylated surface has a higher binding energy for CH<sub>4</sub>, indicating the O saturated surface condition is relatively more stable when compared with hydroxylated surface in air.

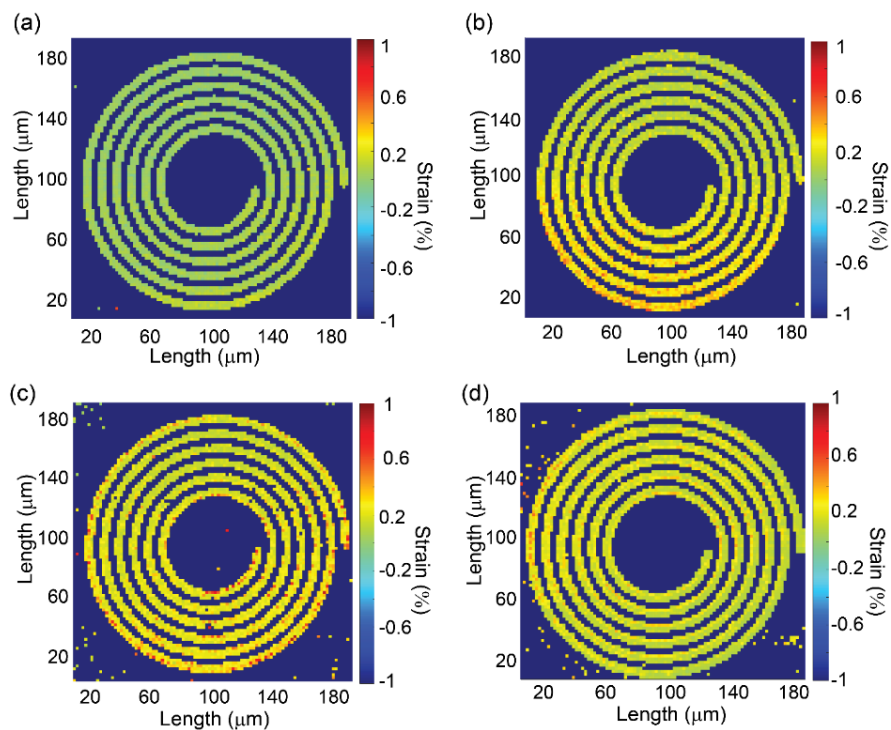

**Figure S19.** The strain mappings (via Raman) of monolayer MoS<sub>2</sub> spirals after the first through fourth growth cycles.

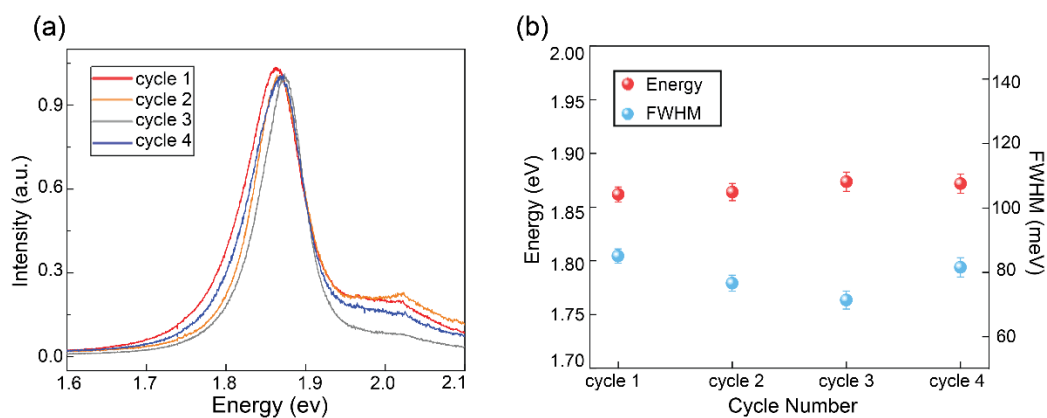

**Figure S20. PL characterizations for repeated growth of monolayer MoS<sub>2</sub> patterns.** (a) Normalized PL spectra collected on MoS<sub>2</sub> spiral structures in Fig. 4F. (b) The comparison for PL



peak energy and FWHM among samples grown in each cycle. Red dots correspond to the PL peak energy, and blue dots correspond to the FWHM of the PL.

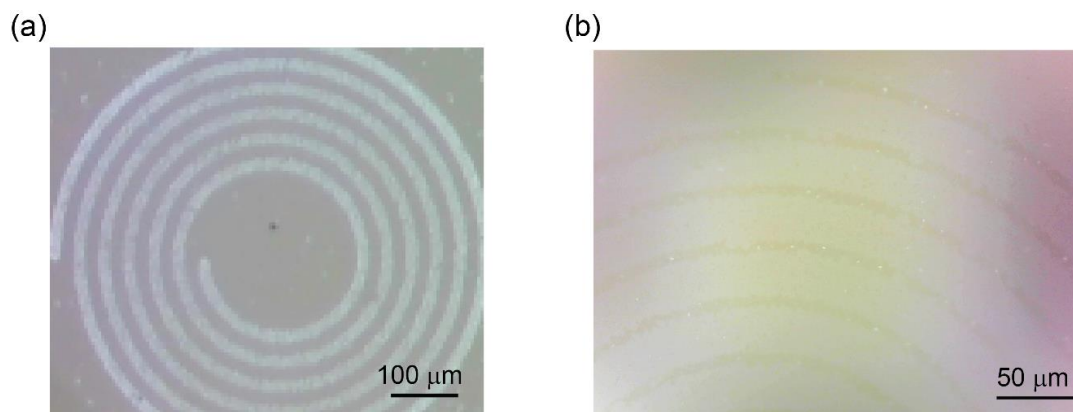

**Figure S21.** (a) OM image of a monolayer MoS<sub>2</sub> spiral spring transferred to a transparent quartz substrate. (b) OM image for monolayer MoS<sub>2</sub> spiral spring transferred to a transparent mica substrate.

### Reference:

1. West, W. A. & Menzies, A. W. C. The Vapor Pressures of Sulphur between 100° and 550° with related Thermal Data. *J. Phys. Chem.* **33**, 1880–1892 (1928).
2. Blackburn, Paul E., Michael Hoch & Johnston Herrick L. The vaporization of molybdenum and tungsten oxides. *J. Phys. Chem.* **62**, 769–773 (1958).
3. Ohring, M. *Materials Science of Thin Films*. (Elsevier, 2001).
